# Supplementary material for: Structural diversity and phylogenetic distribution of valyl tRNA-like structures in viruses
Source: PubMed Central journal article supplement — RNA. 2021 Jan;27(1):27–39. doi: 10.1261/rna.076968.120 (PMC7749636; doi:10.1261/rna.076968.120), 2021-01
Supplement: supp_076968.120_Supplemental_Fig_S1.pdf [file supp_076968.120_Supplemental_Fig_S1.pdf]

**A** Turnip yellow mosaic virus

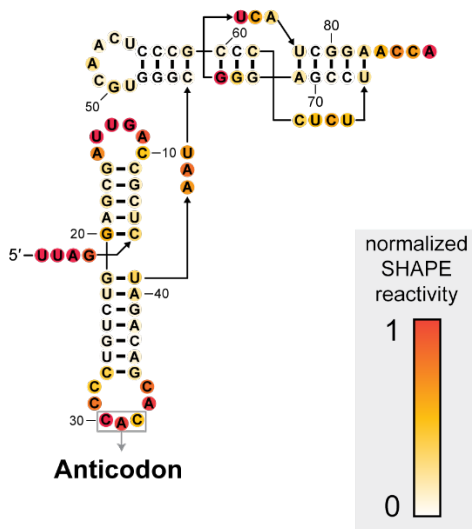

**B** Japanese soil-borne wheat mosaic virus

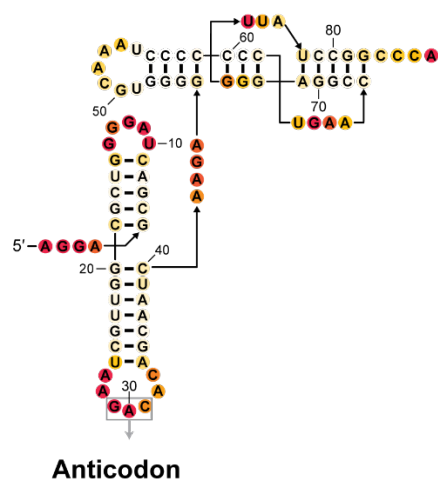

**C** *Nudaurelia capensis* beta virus

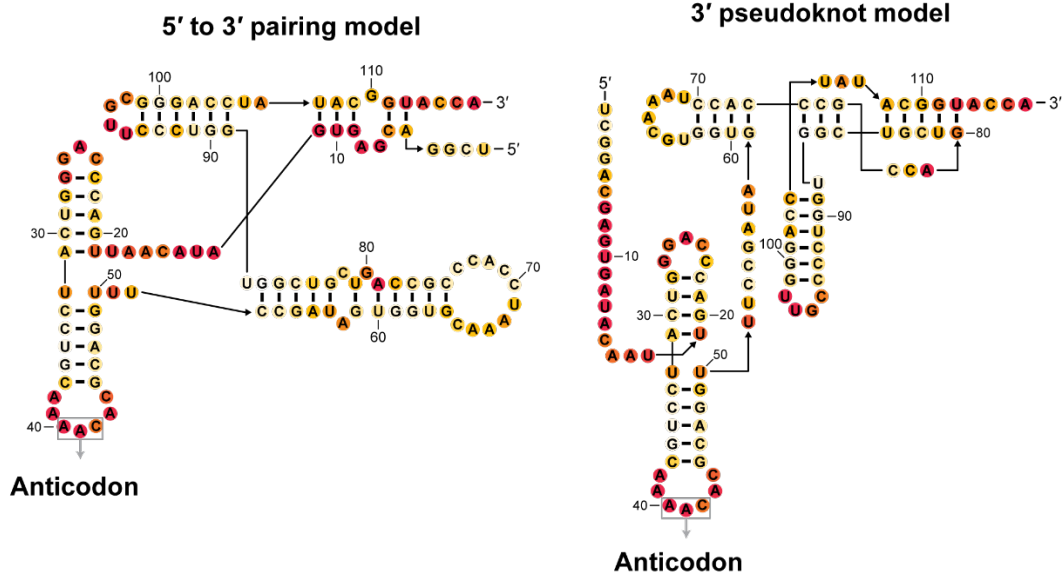

**Supplemental Figure S1.** Additional representative TLS<sup>Val</sup> RNAs conform to predicted secondary structure models. Chemical probing using the SHAPE reagent NMIA of the TLS representatives from turnip yellow mosaic virus (TYMV) (A), Japanese soil-borne wheat mosaic virus (JSWMV) (B), and *Nudaurelia capensis* beta virus (NCBV) (C). To enable direct comparison, reactivity data were plotted on two alternate secondary structure models for *Nudaurelia capensis* beta virus (panel C) and the structure and data presented on the right (3' pseudoknot model) are the same as presented in Figure 2B. Additional details and annotations can be found in the legend to Figure 2.
