# Supplementary material for: Structural diversity and phylogenetic distribution of valyl tRNA-like structures in viruses
Source: PubMed Central journal article supplement — RNA. 2021 Jan;27(1):27–39. doi: 10.1261/rna.076968.120 (PMC7749636; doi:10.1261/rna.076968.120), 2021-01
Supplement: supp_076968.120_Supplemental_Fig_S4.pdf [file supp_076968.120_Supplemental_Fig_S4.pdf]

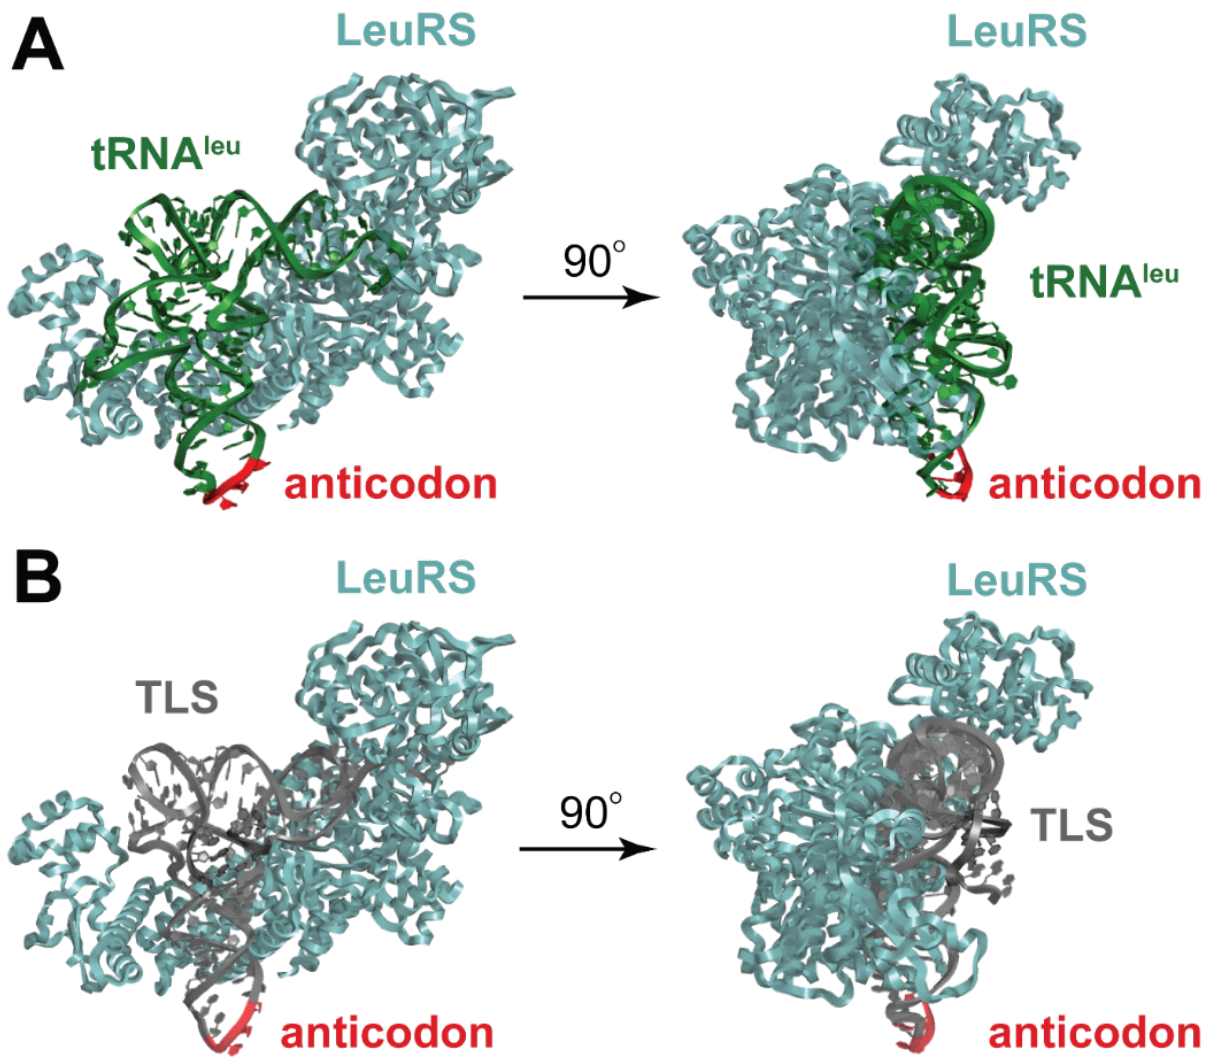

**Supplemental Figure S4.** The anticodon loop is recognized by Leucyl-tRNA synthetase (LeuRS). (A) Structure of tRNA<sup>Leu</sup> (green; anticodon nucleotides in red) in complex with LeuRS (blue) from *Pyrococcus horikoshii*, previously solved by X-ray crystallography (Fukunaga and Yokoyama 2005). (B) Modeling of the TYMV TLS (grey; anticodon nucleotides in red) (Colussi et al. 2014) with LeuRS (blue) from *P. horikoshii*.
