# Supplementary material for: Structural diversity and phylogenetic distribution of valyl tRNA-like structures in viruses
Source: PubMed Central journal article supplement — RNA. 2021 Jan;27(1):27–39. doi: 10.1261/rna.076968.120 (PMC7749636; doi:10.1261/rna.076968.120), 2021-01
Supplement: supp_076968.120_Supplemental_Fig_S5.pdf [file supp_076968.120_Supplemental_Fig_S5.pdf]

**A**

NCBI Multiple Sequence Alignment Viewer, Version 1.16.1

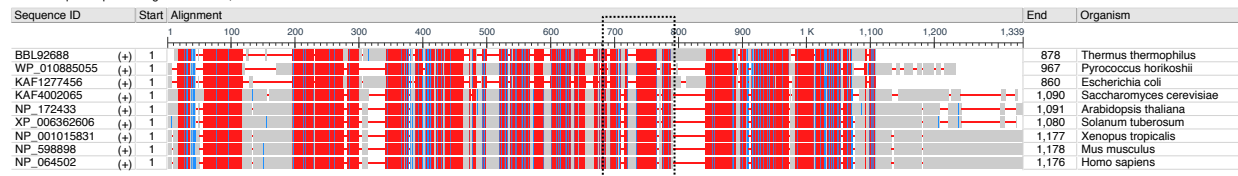**B**

**Thermus thermophilus** 488 GPKAKRDTDMQ-----TFDSEWYLYRTPD[6]DPEKA-----SAMQPVQYIGGVHAVLHLLYSR 550  
**Pyrococcus horikoshii** 546 N--KLRQKGLD---PEKLTPEFFOYIPLRF[6]LEKKTgIPARIHEMKKEFFYVYVPLNRCRSGKDLIPNHLTFPI 622  
**Escherichia coli** 480 GMPALRETDTFD---TFMSEWYLYRTPCE[6]DSEKA-----NYWLPVDIYIGGIEHAIMHLLYFR 542  
**Saccharomyces cerevisiae** 627 F-KDYDNEIGP1GISADQNTDEVFOYIIPRQDQ VKNFM-IPLPALQKLRFEFFYVYVPLDVISIGKDLIPNHLTFPI 701  
**Arabidopsis thaliana** 614 HDGDMYKSGSL--IRPQQNDEWGVLYFC-DGP YPKSGIIPSAVLSEMKQEFYVYVPLDLRVSGKDLIPNHLTFPI 687  
**Solanum tuberosum** 617 QGDMYGNDSH--VPRQLTDEINWFLFC-NGP FPKNS+ISSSLKEMKQEFYVYVPLDLRVSGKDLIPNHLSPCI 690  
**Xenopus tropicalis** 612 QGKLGQGGASPIIRPQNTKEWVYVYVFKKAP FFKYT-IGREKLEKQEFYVYVPLDLRVSGKDLIPNHLSPFI 687  
**Mus musculus** 613 QGGDLNQAESP1IRPQNTKEWVYVYVFKDAP FFKYT-IFREKLDLQKQEFYVYVPLDLRVSGKDLIPNHLSPYI 688  
**Homo sapiens** 611 QGGNLHQAESPIIRPQNTKEWVYVYVFKKAP FFKYT-IAKREKLDLQKQEFYVYVPLDLRVSGKDLIPNHLSPYL 686

551 FTFKFLHDLgmvVVEEFPQLFTQGNVlaTD[53]AVNSKSKNGVWVGPVKEGADJARITLFAAPPENNVWTE 679  
 623 FNIVAIFRE----EHPKGLIANGVGLT--[ 2]QMSKSKGNVLANIDAIENGADVVALYINLAHSDDFDRKH 692  
 543 FFKLMBDAgmvNSDEPAKQLCCQGNVLA-DA[44]SKMSKSKNGIDPQVVERGADTVLRFNMFASPADMTLEWQE 661  
 702 YHVALFPK---KF--NPKIRANGHML-NN SKMSKSTGNMFLRQVVEFGADAARAFADAGDVEDANFSE 771  
 688 YHVALMAN---NM--NPKIRANGHML-NS SKMSKSTGNMFLRQVVEFGADTFLADAGDVEDANFVE 757  
 691 YHVTAMPK---HH--NPKIRANGHML-NS SKMSKSTGNMFLRQVVEFGADTFLADAGDVEDANFVE 760  
 688 YHVTAMPK---DSEKMPVAVRANGHLL-NS SKMSKSTGNMFLRQVVEFGADTFLADAGDVEDANFVE 759  
 689 YHVTAMPK---QSDKMPVAVRANGHLL-NS SKMSKSTGNMFLRQVVEFGADTFLADAGDVEDANFVE 760  
 687 YHVTAMPK---QSDKMPVAVRANGHLL-NS SKMSKSTGNMFLRQVVEFGADTFLADAGDVEDANFVE 758

680 GVGA----KRFKRIYRVA[6]ETS9VQAALGKORELYGKLTAKVTDLEALR-FYNTAIALMFLNALYE 757  
 693 EVG----KLRKQIERFYLISQ[1]AEY+VKGNVELKIDRNMALRLNAIKETTNALERF-TRTAVQAFYSIMDLR 765  
 662 GVGA----NRFKRWKLYE[4]GDVAALNVQALYDQKALRDLVHTIAKVTDDIGRQLFYNTAIALMFLNALYK 738  
 772 NANAAILRFLKEMWAE-FTK ESN-LRTGELTFDPIAEHEMNALEKTEQYALTN-YKNALYGLFDPQAARD 845  
 758 TANAAILRFLKEMWAEVLDV ESN-LRTGEPSTYADKVFEMHNALEKTERAYDCL-FKREALEKGFVDPQAARD 832  
 761 TANAAILRFLKEMWAEVLSA EFS-LRNGPSTYADRVFANINIAVTAENYSETH-FKREALEKGFVDPQAARD 835  
 760 MADAGILRELYTWVVKEMLAN FDS-LRSGTSHYNDRVFASINAGIKVTKQNTKEM-FKREALEKGFVDPQAARD 834  
 761 MADAGILRELYTWVVKEMLAS CSS-LRSGFADSNDRVFASEMAGIKVTKQNTKEM-FKREALEKGFVDPQAARD 835  
 759 MADAGILRELYTWVVKEMVAN WDS-LRSGASTYNDRVFASEMAGIKVTKQNTKEM-FKREALEKGFVDPQAARD 833

**C**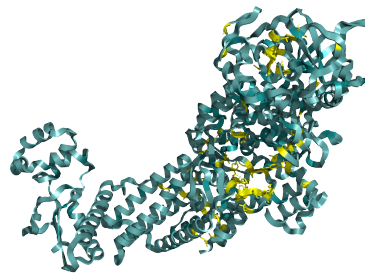**E**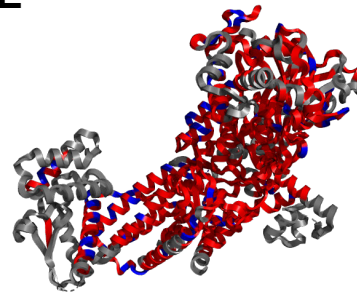**D**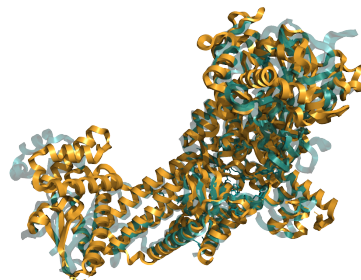**F**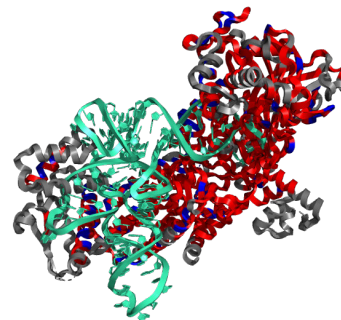

**Supplemental Figure S5.** LeuRS protein alignments and conservation analysis. (A,B) LeuRS protein alignments, performed similarly to the ValRS alignments (Fig. S2A-B), from nine species indicated in the figure with a zoom-in of the sequence alignment corresponding to the boxed region in panel A. (C) The structural model of *P. horikoshii* LeuRS (teal) with conserved residue positions by identity across all species highlighted yellow. (D) Protein structure alignment of LeuRS from *P. horikoshii* (teal) with a model of LeuRS from *S. tuberosum* generated using Phyre2 (Kelley et al. 2015) (orange). (E,F) The Phyre2 *S. tuberosum* structural model colored to match the conservation alignment from panel A in the absence (E) and presence (F) of tRNA<sup>val</sup> (teal).
