# Supplementary material for: Structural diversity and phylogenetic distribution of valyl tRNA-like structures in viruses
Source: PubMed Central journal article supplement — RNA. 2021 Jan;27(1):27–39. doi: 10.1261/rna.076968.120 (PMC7749636; doi:10.1261/rna.076968.120), 2021-01
Supplement: supp_076968.120_Supplemental_Fig_S6.pdf [file supp_076968.120_Supplemental_Fig_S6.pdf]

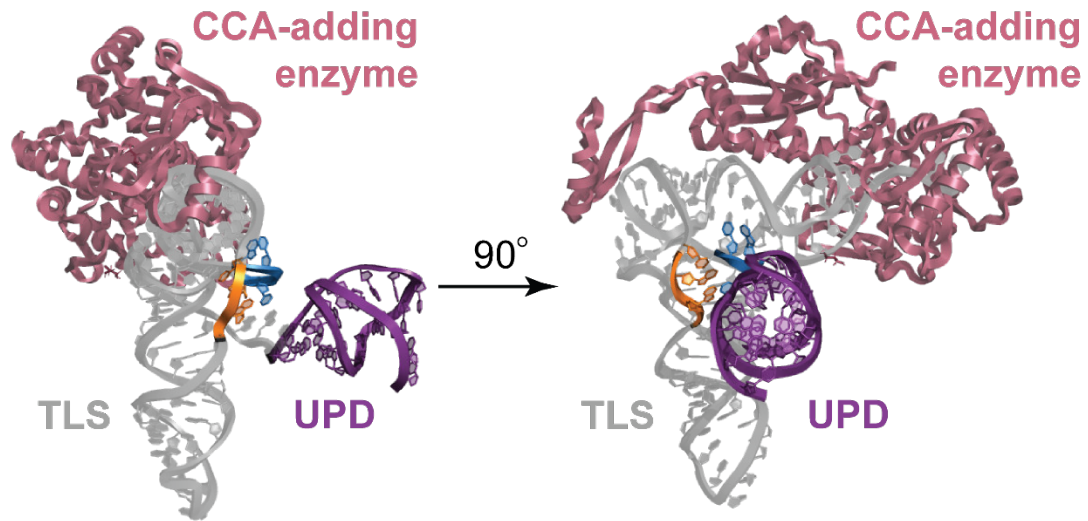

**Supplemental Figure S6.** Sites of stem insertions do not interfere with protein binding sites. Modeling of the TYMV TLS<sup>Val</sup> (grey) with the CCA-adding enzyme (pink) from *Archaeoglobus fulgidus* (Kuhn et al. 2015). The UPD for the TYMV TLS is colored purple, and nucleotides in the sites of insertion for PCV and NCBV are colored orange and blue, respectively. See Figure 4 for additional details.
