# Supplementary material for: Structural diversity and phylogenetic distribution of valyl tRNA-like structures in viruses
Source: PubMed Central journal article supplement — RNA. 2021 Jan;27(1):27–39. doi: 10.1261/rna.076968.120 (PMC7749636; doi:10.1261/rna.076968.120), 2021-01
Supplement: supp_076968.120_Supplemental_References.pdf [file supp_076968.120_Supplemental_References.pdf]

## Supplemental References

- Colussi TM, Costantino DA, Hammond JA, Ruehle GM, Nix JC, Kieft JS. 2014. The structural basis of transfer RNA mimicry and conformational plasticity by a viral RNA. *Nature* **511**: 366-369.
- Fukunaga R, Yokoyama S. 2005. Crystal structure of leucyl-tRNA synthetase from the archaeon *Pyrococcus horikoshii* reveals a novel editing domain orientation. *Journal of molecular biology* **346**: 57-71.
- Kelley LA, Mezulis S, Yates CM, Wass MN, Sternberg MJ. 2015. The Phyre2 web portal for protein modeling, prediction and analysis. *Nature protocols* **10**: 845-858.
- Kuhn C-D, Wilusz JE, Zheng Y, Beal PA, Joshua-Tor L. 2015. On-enzyme refolding permits small RNA and tRNA surveillance by the CCA-adding enzyme. *Cell* **160**: 644-658.
- Papadopoulos JS, Agarwala R. 2007. COBALT: constraint-based alignment tool for multiple protein sequences. *Bioinformatics* **23**: 1073-1079.
- Sievers F, Higgins DG. 2018. Clustal Omega for making accurate alignments of many protein sequences. *Protein Science* **27**: 135-145.
- Sievers F, Wilm A, Dineen D, Gibson TJ, Karplus K, Li W, Lopez R, McWilliam H, Remmert M, Söding J. 2011. Fast, scalable generation of high-quality protein multiple sequence alignments using Clustal Omega. *Molecular systems biology* **7**: 539.
