# Supplementary material for: Structural diversity and phylogenetic distribution of valyl tRNA-like structures in viruses
Source: PubMed Central journal article supplement — RNA. 2021 Jan;27(1):27–39. doi: 10.1261/rna.076968.120 (PMC7749636; doi:10.1261/rna.076968.120), 2021-01
Supplement: supp_076968.120_Supplemental_Table_S1.pdf [file supp_076968.120_Supplemental_Table_S1.pdf]

**Supplemental Table S1.** DNA oligonucleotide sequences used in this study.

| DNA sequence                                                                                                                                                                                                                                                                                                                                            | Description                                                                                                                                                                                                                                                                                      |
|---------------------------------------------------------------------------------------------------------------------------------------------------------------------------------------------------------------------------------------------------------------------------------------------------------------------------------------------------------|--------------------------------------------------------------------------------------------------------------------------------------------------------------------------------------------------------------------------------------------------------------------------------------------------|
| <p>GCGAGTGAATTCTAATACGACTCACTATAGGAA<br/> <u>ACGACTCGAGTAGAGTCGAAAATTAGCTCGCCA</u><br/>           GTTAGCGAGGTCTGTCCCCACACGACAGATAAT<br/>           CGGGTGCAACTCCCGCCCCTCTTCCGAGGGTC<br/>           ATCGGAACCAGTTGGAGTCGAGTAGACTCCAAC<br/>           AAAAGAAACAACAACAACGGATCCGCGAT</p>                                                                   | <p>Gene block (dsDNA) fragment including the TLS representative from turnip yellow mosaic virus and flanking normalization hairpins (underlined) for chemical probing. Used as a template for all chemical probing and aminoacylation experiments.</p>                                           |
| <p>GCGAGTGAATTCTAATACGACTCACTATAGGAA<br/> <u>ACGACTCGAGTAGAGTCGAAAAAGGAGCGACT</u><br/>           AGGGGTCGCGGTTGCTAAGACACAGCAATCAA<br/>           GAGGGGTGCAAATCCCCCCTGAACCGGAGGG<br/>           TTATCCGGCCAGTTGGAGTCGAGTAGACTCCA<br/>           ACAAAGAAACAACAACAACGGATCCGCGA<br/>           T</p>                                                      | <p>Gene block (dsDNA) fragment including the TLS representative from Japanese soil-borne wheat mosaic virus and flanking normalization hairpins (underlined) for chemical probing. Used as a template for all chemical probing and aminoacylation experiments.</p>                               |
| <p>GCGAGTGAATTCTAATACGACTCACTATAGGAA<br/> <u>ACGACTCGAGTAGAGTCGAAAATGTGCCGACAA</u><br/>           GTTGTCGGGAGTGCAAGACACGACTTAGTG<br/>           GCTGGCGTAGACTGCTGGTGCGCAAACCTATA<br/>           GAGTTTGCGTAGGTGCAAATCCCCCGTCCATAC<br/>           GGAGCGATATCCGTCCAGTTGGAGTCGAGTA<br/> <u>GACTCCAACAAAAGAAACAACAACAACGGA</u><br/>           TCCGCGAT</p> | <p>Gene block (dsDNA) fragment including the TLS representative from peanut clump virus RNA 2 and flanking normalization hairpins (underlined) for chemical probing. Used as a template for all chemical probing and aminoacylation experiments.</p>                                             |
| <p>GCGAGTGAATTCTAATACGACTCACTATAGGAA<br/> <u>ACGACTCGAGTAGAGTCGAAAAAGGGTAGCC</u><br/>           AGTGCTACCGCGATCTATAAACGATCGTTCAAG<br/>           AGGGTGCAACTCCCCCCCCTTGGAGGGTATC<br/>           CAAGCCCAGTTGGAGTCGAGTAGACTCCAACAA<br/>           AAGAAACAACAACAACAACGGATCCGCGAT</p>                                                                     | <p>Gene block (dsDNA) fragment including the WT TLS representative from Colombian potato soil-borne virus RNA 3 and flanking normalization hairpins (underlined) for chemical probing. Used as a template for all chemical probing and aminoacylation experiments.</p>                           |
| <p>GCGAGTGAATTCTAATACGACTCACTATAGGAA<br/> <u>ACGACTCGAGTAGAGTCGAAAAAGGGTAGCC</u><br/>           AGTGCTACCGCGATCTACACACGATCGTTCAAG<br/>           AGGGTGCAACTCCCCCCCCTTGGAGGGTATC<br/>           CAAGCCCAGTTGGAGTCGAGTAGACTCCAACAA<br/>           AAGAAACAACAACAACAACGGATCCGCGAT</p>                                                                     | <p>Gene block (dsDNA) fragment including the UAA → CAC anticodon mutation TLS representative from Colombian potato soil-borne virus RNA 3 and flanking normalization hairpins (underlined) for chemical probing. Used as a template for all chemical probing and aminoacylation experiments.</p> |
| <p>GCGAGTGAATTCTAATACGACTCACTATAGGAA<br/> <u>ACGACTCGAGTAGAGTCGAAAAGGACAAATACT</u><br/>           GACTTCTAGCCGTTTTTGGAGATAATTA<br/>           ACTCATTATCCGGCTTATGGAAGGGTAGCCAGT<br/>           GCTACCGCGATCTATAAACGATCGTTCAAGAGG<br/>           GTGCAACTCCCCCCCCTTGGAGGGTATCCAA</p>                                                                     | <p>Gene block (dsDNA) fragment including the 5'-extended TLS representative from Colombian potato soil-borne virus RNA 3 and flanking normalization hairpins (underlined) for chemical probing. Used as a template for all chemical probing and aminoacylation experiments.</p>                  |

|                                                                                                                                                                                                                                                         |                                                                                                                                                                                                                                                     |
|---------------------------------------------------------------------------------------------------------------------------------------------------------------------------------------------------------------------------------------------------------|-----------------------------------------------------------------------------------------------------------------------------------------------------------------------------------------------------------------------------------------------------|
| GCCCAGTTGGAGTCGAGTAGACTCCAACAAAA<br>GAAACAACAACAACGGATCCGCGAT                                                                                                                                                                                           |                                                                                                                                                                                                                                                     |
| GCGAGTGAATTCTAATACGACTCACTATAGGAA<br>ACGACTCGAGTAGAGTCGAAAATCGGACGAGT<br>GATACAATTGACCCAGGGTCATCCTGCAAAACA<br>CGCAGGTTTCCGATAGTGGTGCAAATCCACCC<br>GCCAGTCGTCGGTGGTCCCTTGCGGGACCTAT<br>ACGGTACCAGTTGGAGTCGAGTAGACTCCAACA<br>AAAGAAACAACAACAACGGATCCGCGAT | Gene block (dsDNA) fragment including the TLS representative from Nudaurelia capensis beta virus and flanking normalization hairpins (underlined) for chemical probing. Used as a template for all chemical probing and aminoacylation experiments. |
| GCGAGTGAATTCTAATACGACTCACTATAGG                                                                                                                                                                                                                         | Forward ssDNA primer to amplify all templates for chemical probing experiments.                                                                                                                                                                     |
| GTTGTTGTTGTTGTTTCTTTTGTGGAGTCTACT<br>C                                                                                                                                                                                                                  | Reverse ssDNA primer to amplify all templates for chemical probing experiments.                                                                                                                                                                     |
| TAATACGACTCACTATAGGTTAGCTCGCCAGTT<br>AGCGAGG                                                                                                                                                                                                            | Forward ssDNA primer to amplify the TYMV TLS template for <i>in vitro</i> aminoacylation experiments.                                                                                                                                               |
| mUmGGTTCCGATGACCCTCGGA                                                                                                                                                                                                                                  | Reverse ssDNA (with two 2' O-methyl bases at the 5' end) primer to amplify the TYMV TLS template for <i>in vitro</i> aminoacylation experiments.                                                                                                    |
| TAATACGACTCACTATAGGAGGAGCGACTAGGG<br>GTCG                                                                                                                                                                                                               | Forward ssDNA primer to amplify the JSWMV TLS template for <i>in vitro</i> aminoacylation experiments.                                                                                                                                              |
| mUmGGGCCGGATAACCCTCCG                                                                                                                                                                                                                                   | Reverse ssDNA (with two 2' O-methyl bases at the 5' end) primer to amplify the JSWMV TLS template for <i>in vitro</i> aminoacylation experiments.                                                                                                   |
| TAATACGACTCACTATAGGTGTGCCGACAAGTT<br>GTCGGG                                                                                                                                                                                                             | Forward ssDNA primer to amplify the PCV RNA 2 TLS template for <i>in vitro</i> aminoacylation experiments.                                                                                                                                          |
| mUmGGGACGGATATCGCTCCG                                                                                                                                                                                                                                   | Reverse ssDNA (with two 2' O-methyl bases at the 5' end) primer to amplify the PCV RNA 2 TLS template for <i>in vitro</i> aminoacylation experiments.                                                                                               |
| TAATACGACTCACTATAGGAAGGGTAGCCAGTG<br>CTACCG                                                                                                                                                                                                             | Forward ssDNA primer to amplify the CPSbV RNA 3 TLS template for <i>in vitro</i> aminoacylation experiments.                                                                                                                                        |
| mUmGGGCTTGGATACCCTCCAAGG                                                                                                                                                                                                                                | Reverse ssDNA (with two 2' O-methyl bases at the 5' end) primer to amplify the CPSbV RNA 3 TLS template for <i>in vitro</i> aminoacylation experiments.                                                                                             |
| TAATACGACTCACTATAGGTCCGACGAGTGATA<br>CAATTGACCCAG                                                                                                                                                                                                       | Forward ssDNA primer to amplify the NCBV TLS template for <i>in vitro</i> aminoacylation experiments.                                                                                                                                               |

|                                                                                                                                                                                                                                                                                                                                                                                                                                                                                                                                                                                                                                                                                                                                                                                                                                                                          |                                                                                                                                                                                                                                                          |
|--------------------------------------------------------------------------------------------------------------------------------------------------------------------------------------------------------------------------------------------------------------------------------------------------------------------------------------------------------------------------------------------------------------------------------------------------------------------------------------------------------------------------------------------------------------------------------------------------------------------------------------------------------------------------------------------------------------------------------------------------------------------------------------------------------------------------------------------------------------------------|----------------------------------------------------------------------------------------------------------------------------------------------------------------------------------------------------------------------------------------------------------|
| mUmGGTACCGTATAGGTCCCGC                                                                                                                                                                                                                                                                                                                                                                                                                                                                                                                                                                                                                                                                                                                                                                                                                                                   | Reverse ssDNA (with two 2' O-methyl bases at the 5' end) primer to amplify the NCBV TLS template for <i>in vitro</i> aminoacylation experiments.                                                                                                         |
| TAATACGACTCACTATAGGCAATTGACCCAGGG<br>TCATCCTGC                                                                                                                                                                                                                                                                                                                                                                                                                                                                                                                                                                                                                                                                                                                                                                                                                           | Forward ssDNA primer to amplify the 5'-truncated NCBV TLS template for <i>in vitro</i> aminoacylation experiments.                                                                                                                                       |
| TAATACGACTCACTATAGGAGGGTTGGCCGAGT<br>GGTCTAAGGCGGCAGACTTAAGATCTG                                                                                                                                                                                                                                                                                                                                                                                                                                                                                                                                                                                                                                                                                                                                                                                                         | Forward overlapping primer to create a template for the yeast tRNA <sup>Leu</sup> <i>in vitro</i> aminoacylation assay.                                                                                                                                  |
| mUmGGTGAAGGATGCGAGGTTCGAACTCGCGC<br>GGACAACCGTCCAACAGATCTTAAGTCTGCCGC<br>C                                                                                                                                                                                                                                                                                                                                                                                                                                                                                                                                                                                                                                                                                                                                                                                               | Reverse overlapping (with two 2' O-methyl bases at the 5' end) primer to create a template for the yeast tRNA <sup>Leu</sup> <i>in vitro</i> aminoacylation assay.                                                                                       |
| TAATACGACTCACTATAGGTGGTTTGCCCGAGT<br>GGTTAAGGGGGAAGACTTAAGATCTTC                                                                                                                                                                                                                                                                                                                                                                                                                                                                                                                                                                                                                                                                                                                                                                                                         | Forward overlapping primer to create a template for the potato tRNA <sup>Leu</sup> <i>in vitro</i> aminoacylation assay.                                                                                                                                 |
| mUmGGTGGTGGCTGTGGGGTTCGAACCCACG<br>CGCACTTATGTGCAGAAGATCTTAAGTCTTCCC<br>CC                                                                                                                                                                                                                                                                                                                                                                                                                                                                                                                                                                                                                                                                                                                                                                                               | Reverse overlapping (with two 2' O-methyl bases at the 5' end) primer to create a template for the potato tRNA <sup>Leu</sup> <i>in vitro</i> aminoacylation assay.                                                                                      |
| 5'-/5-<br>6FAM/AAAAAAAAAAAAAAAAAATGGTTCCGA<br>TGACCCTCGGAAGAGG                                                                                                                                                                                                                                                                                                                                                                                                                                                                                                                                                                                                                                                                                                                                                                                                           | FAM-labeled RT primer.                                                                                                                                                                                                                                   |
| CATCATCATCACAGCAGCGGCCTGGTGCCGCG<br>CGGCAGCCATAtgATGAGCAGCGGTCTGGTATT<br>AGAGAACACGGCACGCCGTGACGCTCTGATCG<br>CCATTGAAAAGAAATACCAGAAAATCTGGGCCG<br>AGGAACATCAATTTGAGATCGATGCACCTTCAA<br>TCGAGGATGAGCCTATTACCATGGACTCGGAAG<br>AACTTCATCGCACTTATCCAAAGTTTATGAGCTC<br>CATGGCTTATCCGTATATGAACGGTGTATTGCA<br>CGCGGGGCACTGTTTTACGCTTCAAAGGTGGA<br>GTTTAGCATTGGGTTTGAGCGTATGAACGGGAA<br>GCGTGCCCTTTTTCCCTGGGTTTCCACTGTAC<br>AGGCATGCCTATTTTGGCCTGCGCCGATAAACT<br>TAAACGTGAAGCTGAATTGTTTGGTAAGAACTT<br>CGACAACGTGCCAGCGGAAGAGGAAGAAATTA<br>AAGAAGAAACCCCTGCGGAGAAAGATCACGAG<br>GATGTAACCAAATTCAAAGCTAAGAAAAGTAAA<br>GCTGCGGCCAAAAGGGGCGCGGCAAGTACCA<br>GTTCGAAATCATGTTGCAATTAGGTATCCCGCG<br>CGAAGAAATTATTAAGTTTTCGGACGCGAAGTA<br>CTGGCTGACCTACTTTCCGCCGCTGTGCGAGT<br>CCGATTGCACCTCGTTGGGTGCTCGTATCGACT<br>GGCGCCGTTTCATTCGTAACGACCGACGCTAATC<br>CATATTATGACGCGTTTATCCGCTGGCAAATGA | Gene block fragment (dsDNA) #1 for the N-terminal region of the LeuRS protein from <i>S. cerevisiae</i> . Used in conjunction with gene block fragment #2 (see below) for Gibson assembly and a pET15b vector for protein expression in <i>E. coli</i> . |

ATAAACTTAAGGCTGCCGGAAGATCAAGTTCG  
GGGAACGTTATACGATTTATAGTGAAAAGGACG  
GCCAAGCGTGCATGGACCATGATCGCCAATCT  
GGCGAGGGGGTTACACCCCAGGAGTACATTGG  
CGTAAAAATCGAGGCTTTGGAATTCGCTGACGA  
TGCAGCTAAAATCATCGACTCCTCTTCAGATCT  
GGATAAGTCCAAAAAGTTTTATTTTGTGCGCAGCT  
ACCCTTCGCCCGGAGACTATGTATGGACAAACA  
TGCTGCTTCGTTTCGCCGACGATCGAATACGGG  
ATCTTCGACGCGGGAGACAGTTATTTTATTA  
CAGAGCGCGCATTCAAAAACATGAGCTACCAGA  
AACTTACTCCTAAGCGCGGTTTTTACAAACCTAT  
TGTAACCGTTCCTGGCAAGGCATTTATTGGAAC  
GAAAATCCACGCACCTCAGTCGGTGTATCCCGA  
ACTTCGTATTCTGCCGATGGAGACGGTTATTGC  
AACTAAAGGTACGGGGGTTGTTACGTGTGTGCC  
TTCAAACCTACCAGACGATTACATCACCACAAA  
AGACTTATTACACAAGCCAGAATATTACGGTATT  
AAGCCTGAATGGATCGATCATGAGATTGTTCCG  
ATTATGCATACTGAGAAGTACGGTGACCTTACA  
GCGAAGGCGATCGTAGAAGAGAAAAAATTCAG  
AGCCCTAAAGATAAGAACTTGTTGGCCGAGGCT  
AAAAAAATTGCTTATAAAGAGGATTATTACACGG  
GCACCATGATTTATGGTCCATATAAGGGCGAGA  
AAGTTGAGCAAGCCAAAAATAAGGTAAAGGCGG  
ATATGATCGCTGCGGGTGAGGCCTTCGTGTATA  
ATGAACCCGAGTCACAAGTTATGTCACGTTCCG  
GAGACGACTGCATTGTCAGTTTGGAGGACCAAT  
GGTACGTAGATTATGGTGAAGAATCATGGAAGA  
AGCAGGCCATCGAGTGTTTGAAGGGATGCAG  
TTATTCGCGCCGGAGGTGAAAAATGCCTTTGAG  
GGCGTTCTTGACTGGCTTAAGAACTGGGCCGTA  
TGCCGCACGTACGGTCTGGGCACACGCCTTCC  
ATGGGATGAAAAATATTTGGTGGAAAGTTTGAG  
CGATTCAACCATCTACCAGTCCTTTTACACCATC  
GCCACCTTCTTTTCAAGGACTACTATGGCAAT  
GAGATTGGACCACTTGGAATTTCCGCTGACCAG  
ATGACAGACGAGGTCTTTGACTACATCTTTCAG  
CATCAAGATGATGTGAAGAATACGAATATTCCC  
TTGCCAGCATTACAGAAATTACGCCGTGAATTC  
GAATACTTTTACCCGCTTGACGTGTCAATTAGT  
GGCAAAGACTTAATCCCTAATCATTTGACCTTCT  
TCATTTATACCCATGTGGCGTTGTTCCCTAAAAA  
GTTCTGGCCTAAAGGTATCCGTGCAAATGGTCA  
CTTGATGCTTAATAATTCCAAAATGTCAAAGTCA  
ACAGGAAATTTTATGACTCTTGAGCAAACGGTA  
GAAAAGTTCGGTGCGGATGCTGCGCGCATCGC

|                                                                                                                                                                                                                                                                                                                                                                                                                                                                                                                                                                                                                                                                                                                                                                  |                                                                                                                                                                                                                                                               |
|------------------------------------------------------------------------------------------------------------------------------------------------------------------------------------------------------------------------------------------------------------------------------------------------------------------------------------------------------------------------------------------------------------------------------------------------------------------------------------------------------------------------------------------------------------------------------------------------------------------------------------------------------------------------------------------------------------------------------------------------------------------|---------------------------------------------------------------------------------------------------------------------------------------------------------------------------------------------------------------------------------------------------------------|
| <p> ATTTGCAGATGCCGCGATACAGTTGAGGACG<br/> CGAACTTTGACGAATCGAATGCTAATGCGGCAA<br/> TCCTTCGCCTGTTCAACTTGAAGGAGTGGGCG<br/> GAAGAAATTACCAAGGAAAGTAATCTTCGTACG<br/> GGGGAAATCACGGACTTCTTTGACATTGCATTG<br/> GAGCACGAGATGAACGCGCTTATTGAAAAAACT<br/> TATGAGCAGTATGCCTTGAATAACTATAAAAAAC<br/> GCCCTGAAGTACGGATTGTTGACTTCCAGGCC<br/> GCACGCGATTATTATCGTGAAGCATCTGGCGTG<br/> ATGCATAAGGATTTAATTGCCCGCTACATTGAG<br/> ACACAGGCATTGCTTTTGGCGCCTATCGCACCA<br/> CACTTTGCAGAGTACATTTACCGTGAGGTTCTT<br/> GGCAATCAGACAAGCGTTCAGAACGCCAAATTC<br/> CCCCGCGCGTCTAAGCCGGTAGACAAGGGTGT<br/> CTTGGCAGCGCTTGATTACCTGCGTAATCTTCA<br/> GCGCTCAATCCGCGAGGGTGAGGGGCAGGCC<br/> CTGAAGAAGAAAAAGGGGAAGTCAGCGGAAAT<br/> CGACGCATCAAAGCCCGTTAAGCTTACGTTATT<br/> GATCAGTGAATCTTTTCCTGAATGGCAATCTC </p> |                                                                                                                                                                                                                                                               |
| <p> GGGGAAGTCAGCGGAAATCGACGCATCAAAGC<br/> CCGTTAAGCTTACGTTATTGATCAGTGAATCTTT<br/> TCCTGAATGGCAATCTCAATGCGTTGAGATCGT<br/> CCGTAAGTATTTTCTGAGCAGACGCTTGATGA<br/> CAACAAAAAGGTGCGCGAGCACATCGAACCAA<br/> AAGAGATGAAACGTGCGATGCCATTTATCTCTC<br/> TGCTTAAACAGCGTCTGGCTAACGAAAAACCCG<br/> AGGACGTTTTTGAACGTGAGTTACAATTCAGTG<br/> AGATTGACACCGTTAAAGCAGCCGCACGTAACG<br/> TAAAGAAAGCCGCTCAGGCTCTTAAGATCGCAG<br/> AATTTTCGGCAATTAGCTTCCCGTACGGCGCTA<br/> AGACAGGCAAAGACATCTTCACGGGGGAAGAA<br/> GTTGAAATCCCCCAGTCACGAAGATCGTGGA<br/> GAACGCGGTCCCAGGAAATCCTGGGGTCGTCT<br/> TTCAAAACATCTAGGGATCCGGCTGCTAACAAA<br/> GCCCGAAAGGAAGCTGAGTTGGCTGC </p>                                                                                                                           | <p>Gene block fragment (dsDNA) #2 for the C-terminal region of the LeuRS protein from <i>S. cerevisiae</i>. Used in conjunction with gene block fragment #1 (see above) for Gibson assembly and a pET15b vector for protein expression in <i>E. coli</i>.</p> |
